# Supplementary material
Source: ML conference proceedings conference paper supplement (https://openreview.net/forum?id=eSZcf8LCxz)
Supplement: supplementary_material [file supplementary.pdf › supplementary.pdf]

---

# BecomingLit: Relightable Gaussian Avatars with Hybrid Neural Shading

## Supplementary Material

---

Anonymous Author(s)

Affiliation

Address

email

### 778 A Network Architecture

779 Our geometry module  $\mathcal{F}_g$  maps FLAME [17] expression, jaw and eyes pose coefficients, and predicts per-textel  
780 attributes  $\{\delta\mu, \mathbf{q}, \mathbf{s}, \sigma, \mathbf{f}^{expr}\}_{k=1}^M$ , where  $\mathbf{f}_k^{expr}$  has a dimension of 32 in all experiments. We use the first  
781 100 principal components for the expression parameter, and a rodrigues parameterization for jaw and both eye  
782 rotations. Hence, our input of shape  $\mathbb{R}^{109}$  is transformed by a linear layer and then reshaped to  $256 \times 8 \times 8$ . A  
783 set of transposed convolutional layers then gradually upsamples the feature maps to the final output of shape  
784  $43 \times 512 \times 512$ . We use leaky-ReLU as activation function for all layers except for the final output. For all  
785 convolutional layers, we adopt untied bias [4].

786  $\mathcal{F}_v$  takes as input the per-Gaussian feature map  $\mathbf{f}^{expr}$ , and the view direction, which is encoded using a single  
787 linear layer (8-dim output shape) and then expanded to the height and with dimension of the feature map. We  
788 concatenate the feature map and encoded view direction and feed it through a single convolutional layer which  
789 downsamples the input by half. Finally, a transposed convolutional layer maps the latent feature map back to its  
790 original resolution with 4 output channels.

791 Our diffuse BRDF network  $\mathcal{F}_d$  is a 3-layer MLP with hidden dimension 64 and leaky-ReLU activation in every  
792 layer, except the last one. The input is the concatenation of  $\mathbf{f}_k^{expr}$  and the spherical harmonics coefficients of the  
793 incident light.

### 794 B Environment Map Rendering

795 In this section, we provide further details on how we render our avatars with all-frequency continuous illumination  
796 in the form of environment maps. While our diffuse BRDF trivially adopts to continuous illumination due to the  
797 spherical harmonics parameterization, we need to adopt the specular shading of the primitives.

798 For the specular pre-integration, we follow the split-sum approximation [14]. Karis et al. [14] propose to assume  
799 that the view direction  $\omega_o$  and the surface normal  $\mathbf{n}$  are identical. With that assumption, the specular reflection  
800 is no longer view-dependent, and we can pre-integrate the environment map for different roughness values using  
801 a mipmap. In each mipmap level, we numerically integrate  $L_i$  with importance sampling using the Blinn-Phong  
802 distribution:

$$L_o^{specular}(\mathbf{x}, \omega_o) = \int_{\Omega} L_i(\omega_i) D(\mathbf{h}, \mathbf{n}, r^2) (\omega_i \cdot \mathbf{n}) d\omega_i * \int_{\Omega} k_s \frac{DGF}{4(\omega_o \cdot \mathbf{n})(\mathbf{n} \cdot \omega_i)} d\omega_i \quad (8)$$

803 The incoming illumination  $L_i(\omega_i)$  is now stored in the pre-integrated environment map  $\hat{L}_{specular}(\omega, r)$ . During  
804 rendering, we linearly interpolate the mip levels to obtain the final radiance value for the roughness parameter.  
805 Hence, the new specular term becomes:

$$L_o^{specular}(\mathbf{x}, \omega_o) \approx \hat{L}_{specular}(\omega, r) \int_{\Omega} k_s \frac{DGF}{4(\omega_o \cdot \mathbf{n})(\mathbf{n} \cdot \omega_i)} d\omega_i \quad (9)$$

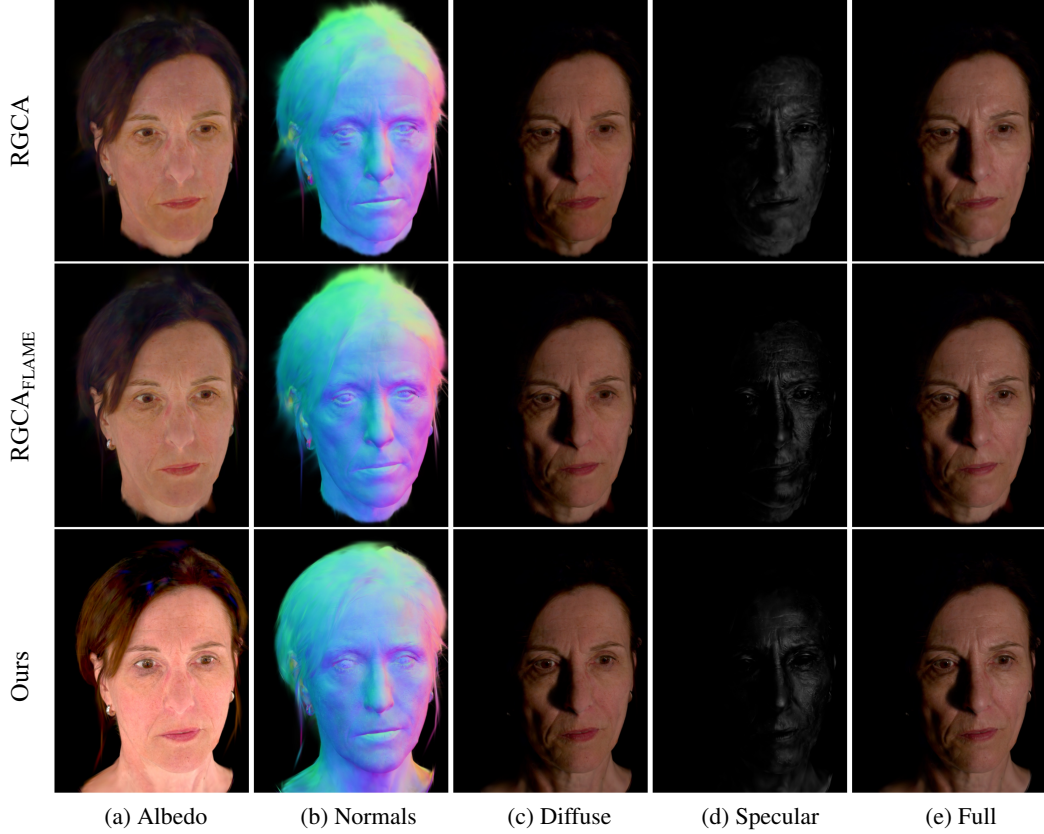

Figure 8: **Comparison on Intrinsic Decomposition:** We compare the recovered albedo (a) and normals (b), as well as the diffuse (c) and specular (d) contributions that sum up to the final rendering (e).

806 The remaining integral is essentially the integration of the BRDF with a completely white environment light. We  
807 can substitute the Fresnel term  $F(\omega_o, \mathbf{h})$  with the Schlick approximation [36] and factor out  $F_0$ :

$$\int_{\Omega} f_s(\omega_i, \omega_o)(\mathbf{n} \cdot \omega_i) d\omega_i = F_0 \int_{\Omega} \frac{f_s(\omega_i, \omega_o)}{F(\omega_o, \mathbf{h})} (1 - (1 - \omega_o \cdot \mathbf{h})^5) (\omega_i \cdot \mathbf{n}) d\omega_i + \int_{\Omega} \frac{f_s(\omega_i, \omega_o)}{F(\omega_o, \mathbf{h})} (1 - \omega_o \cdot \mathbf{h})^5 (\omega_i \cdot \mathbf{n}) d\omega_i \quad (10)$$

808 These integrals depend on the two inputs  $(\omega_i \cdot \mathbf{n})$  and the roughness parameter  $r$  and act as a scale and bias to  
809  $F_0$ . We pre-integrate both terms for all possible input combinations in  $[0, 1]^2$  and store the two outputs in the 2D  
810 texture map  $\hat{\mathbf{f}}_s(\omega, r)$

811 During rendering, we can now compute the shaded color by evaluating the following terms:

$$\omega_r = -\omega_o - 2(-\omega_o \cdot \mathbf{n})\mathbf{n} \quad (11)$$

$$a, b = \hat{\mathbf{f}}_s((\omega_r \cdot \mathbf{n}), r) \quad (12)$$

$$c_k^s(\omega_o) = (a k_s + b) \hat{L}_{specular}(\omega_r, r) \quad (13)$$

## 812 C Additional Results

813 In Figure 8 we provide a qualitative comparison on the intrinsic decomposition performed by different methods.  
814 Our approach recovers a cleaner albedo and sharper specular highlights, resulting in more realistic renderings.

815 In addition, we ask the reviewers to watch our supplementary video for more results, which allow for a more  
816 complete comparison, including the temporal axis.

## 817 **D Capture Script**

818 For each participant of our dataset, we record 7 sequences in total. The first 6 consist of a predefined set of facial  
819 expressions, emotions and sentences that we ask the subjects to perform and read out. In the 7th sequence the  
820 participant is free to perform any facial expression for 20s. The instructions are given via a screen that is placed  
821 in front of the subject. In the following we provide a list of the single components, which during the capture  
822 sessions are accompanied with images.

- 823 • **Expressions-1:**
  - 824 – Head rotation with mouth open and closed
  - 825 – Eyes blink
  - 826 – Eyes squint
  - 827 – Eyebrows up / down
  - 828 – Puffed Cheeks
  - 829 – Mouth Vacuum
  - 830 – Nose Wrinkle
  - 831 – Lip bite
- 832 • **Expressions-2**
  - 833 – Grin (multiple variations)
  - 834 – Jaw movement
  - 835 – Lip licking
  - 836 – Tongue
- 837 • **Emotions**
  - 838 – Shout
  - 839 – Laugh
  - 840 – Surprise
  - 841 – Fear
  - 842 – Angry
  - 843 – Sad
  - 844 – Disgust
  - 845 – Happy
  - 846 – Confusion
  - 847 – Amazement
  - 848 – Embarrassment
- 849 • **Sentences-1**
  - 850 – A cramp is no small danger on a swim.
  - 851 – He said the same phrase thirty times.
  - 852 – Pluck the bright rose without leaves.
  - 853 – Two plus seven is less than ten.
  - 854 – The glow deepened in the eyes of the sweet girl.
  - 855 – By eating yogurt you may live longer.
- 856 • **Sentences-2**
  - 857 – Bring your problems to the wise chief.
  - 858 – Write a fond note to the friend you cherish.
  - 859 – Clothes and lodging are free to new men.
  - 860 – We frown when events take a bad turn.
  - 861 – Port is a strong wine with a smoky taste.
  - 862 – They had slapped their thighs.
- 863 • **Sentences-3**
  - 864 – She always jokes about too much garlic in his food.
  - 865 – Why put such a high value on being top dog.
  - 866 – All your wishful thinking won't change that.
  - 867 – Take charge of choosing her bridesmaids gowns.
  - 868 – Why buy oil when you always use mine.
